# Supplementary material for: Demographic, occupational and societal risk exposures to physical injuries in a rural community in Western Kenya: a 12-week longitudinal study
Source: HighWire-hosted journal article supplement (doi:10.1136/bmjopen-2021-053161), 2021-09-01
Supplement: bmjopen-2021-053161supp002_data_supplement.pdf [file bmjopen-2021-053161supp002_data_supplement.pdf]

**Table 1S: Distribution and analyses of reports of injuries by risk factors across the follow-up period**

| Risk factor                        | Factor levels                 | Injury      |            | P-values |
|------------------------------------|-------------------------------|-------------|------------|----------|
|                                    |                               | Present (%) | Absent (%) |          |
| Gender                             | Female                        | 26 (59)     | 2275 (54)  | 0.713    |
|                                    | Male                          | 18 (41)     | 1942 (46)  |          |
| Employment type                    | Non-school going <sup>1</sup> | 26 (59)     | 1993 (47)  | 0.193    |
|                                    | School going                  | 18 (41)     | 2224 (53)  |          |
| Education level type               | Post-primary                  | 9 (20)      | 640 (16)   | 0.860    |
|                                    | Primary                       | 35 (80)     | 3343 (84)  |          |
| <b>Household</b>                   |                               |             |            |          |
| Household income                   | 0-10,000                      | 35 (80)     | 3456 (82)  | 0.932    |
|                                    | >10,000 <sup>2</sup>          | 9 (20)      | 761 (18)   |          |
| Insurance cover                    | Yes                           | 10 (23)     | 728 (17)   | 0.648    |
|                                    | No                            | 34 (77)     | 3489 (83)  |          |
| Floor-type                         | Cement floor                  | 11 (25)     | 620 (15)   | 0.458    |
|                                    | Earth floor                   | 33 (75)     | 3597 (85)  |          |
| Wall type                          | Brick wall                    | 8 (18)      | 549 (13)   | 0.634    |
|                                    | Mud wall                      | 36 (82)     | 3668 (87)  |          |
| Roofing type                       | Iron/aluminum sheets          | 44 (100)    | 4107 (97)  | 0.749    |
|                                    | Thatch roofing                | 0 (0)       | 110 (3)    |          |
| Drinking water source              | Other sources <sup>2</sup>    | 24 (55)     | 3045 (72)  | 0.121    |
|                                    | River                         | 20 (46)     | 1172 (28)  |          |
| Treating drinking water            | Yes                           | 37 (84)     | 3418 (81)  | 0.599    |
|                                    | No                            | 7 (16)      | 799 (19)   |          |
| Water treatment method             | Filtration or decantation     | 17 (46)     | 1263 (38)  | 0.131    |
|                                    | Chlorine or boiling           | 20 (54)     | 2099 (62)  |          |
| Waste destination                  | Pit latrine                   | 40 (91)     | 3906 (93)  | 0.493    |
|                                    | Open defecation               | 4 (9)       | 311 (7)    |          |
| Trash disposal                     | Garbage pit                   | 30 (68)     | 3158 (75)  | 0.518    |
|                                    | Garden disposal               | 14 (32)     | 1059 (25)  |          |
| Domesticate animal                 | Yes                           | 40 (91)     | 4091 (97)  | 0.008    |
|                                    | No                            | 4 (9)       | 126 (3)    |          |
| No. of animal species <sup>3</sup> | 0                             | 4 (9)       | 126 (3)    | 0.086    |
|                                    | 1                             | 1 (2)       | 303 (7)    |          |
|                                    | 2                             | 3 (7)       | 518 (12)   |          |
|                                    | 3                             | 18 (41)     | 1113 (27)  |          |
|                                    | 4                             | 15 (34)     | 1305 (31)  |          |
|                                    | 5                             | 3 (7)       | 600 (14)   |          |
|                                    | 6                             | 0 (0)       | 252 (6)    |          |
| Ill animal                         | Yes                           | 9 (22)      | 700 (17)   | 0.371    |
|                                    | No                            | 31 (78)     | 3391 (83)  |          |
| Animal death                       | Yes                           | 3 (9)       | 211 (5)    | 0.411    |
|                                    | No                            | 29 (91)     | 3526 (95)  |          |
| Visible stagnant water             | Yes                           | 6 (14)      | 531 (13)   | 0.716    |
|                                    | No                            | 38 (86)     | 3686 (87)  |          |

|                     |              |         |           |        |
|---------------------|--------------|---------|-----------|--------|
| Visits outside      | Yes          | 11 (25) | 241 (5)   | <0.000 |
| study site          | No           | 33 (75) | 3976 (95) |        |
| Region <sup>4</sup> | Top          | 15 (34) | 1423 (34) | 0.942  |
|                     | Bottom right | 14 (32) | 1123 (26) |        |
|                     | Bottom left  | 15 (34) | 1671 (40) |        |
|                     |              |         |           |        |

<sup>1</sup>Consist of a study participant with formal or informal employment;<sup>2</sup>Other sources consist of springs, wells, municipal water, and rainwater; <sup>3</sup>Consist of domesticated animals, cattle, sheep, goats, poultry, dogs, and cats;<sup>4</sup>Consist of the generated regions of the study site
